# Supplementary material for: The Common p.R114W HNF4A Mutation Causes a Distinct Clinical Subtype of Monogenic Diabetes
Source: Oxford University Press journal article supplement (doi:10.2337/db16-0628), 2016-08-02
Supplement: db160628supplementarydata2.xlsx [file db160628supplementarydata2.xlsx]

## Sheet: Sheet1
Variant Name:	rs6124140	rs6029393	rs909776	rs926293	rs6065647	rs6031225	rs6093923	rs2143606	p.R114W	rs6031601	rs2425641	rs2299691	rs4810439	rs2144649	rs3529	rs11086175	rs914870	rs2057077
Chromosome name:	20	20	20	20	20	20	20	20	20	20	20	20	20	20	20	20	20	20
Chromosome position start (bp):	39334539	40866127	42099246	43315567	43754256	43919190	44061352	44209910	43042354	44429180	44512435	44643697	44749229	44960678	45345218	46508723	47751492	49407099
Chromosome position end (bp):	39334539	40866127	42099246	43315567	43754256	43919190	44061352	44209910	43042354	44429180	44512435	44643697	44749229	44960678	45345218	46508723	47751492	49407099
FamilyID
0047JB01	??	AG	GG	AG	CG	AA	AG	AG	CT	AC	TT	GG	GG	AC	AA	CT	TT	CT
0047JB02	AA	GG	??	AA	CG	AA	??	AG	CT	AC	CT	GG	GG	AC	AA	CT	CT	CT
0047JB05	AA	GG	GG	AA	CG	AA	AG	AG	CT	CC	CT	GT	CG	CC	AG	TT	TT	CT
0741AR02	AC	AG	AA	AA	CC	AC	AA	GG	CT	AC	TT	GT	CG	AA	AG	CT	CT	CT
0741AR05	AC	AG	AG	AA	CG	AA	AA	GG	CT	CC	TT	GT	CG	AC	AA	CT	CT	CT
0741AR07	AC	AG	AA	AA	CC	AC	AA	GG	CT	AC	TT	??	CG	AA	AG	CT	CT	CT
0912BP01	AC	AA	AG	AG	CG	AA	AG	AG	CT	AC	TT	GG	CG	AC	AA	CT	TT	CT
0998LS02	AC	AG	AA	AG	CC	AA	AA	AG	CT	AC	CT	GT	CG	AC	AA	CT	TT	CT
1658HT01	AC	AA	AA	AA	CC	AC	AG	AG	CT	AC	TT	GG	CG	AA	AG	CC	CT	CT
1658HT02	AC	AG	AG	AA	CC	AA	AA	GG	CT	AC	TT	GG	CC	AC	AG	CC	CT	CT
2691FW01	CC	AG	AA	AA	CG	CC	AA	AG	CT	CC	CT	GG	CG	AC	AA	CT	CT	TT
2967AB01	AA	GG	AA	AG	CG	AC	AG	GG	CT	CC	TT	GG	GG	AC	AG	TT	TT	TT
2967AB04	AA	AG	AG	AG	CG	AC	AG	AG	CT	AC	CT	GG	GG	CC	AA	TT	TT	CT
3344NH01	AC	AG	AA	AA	CG	AC	GG	AG	CT	CC	CT	GT	GG	AC	AG	CC	CC	TT
4697CH03	AA	AG	AA	AA	CG	AA	AA	AG	CT	CC	TT	GG	CG	AC	GG	CT	CT	CT
4697CH04	AA	AG	AG	AA	CG	AC	AG	AG	CT	AC	CT	GG	GG	CC	GG	CC	CT	CT
4940CB01	AC	AG	AG	AG	CC	AA	AG	AG	CT	AC	CT	GG	CG	CC	AG	CC	CC	CC
4940CB02	AC	AG	AA	AG	CG	AA	AG	GG	CT	CC	TT	GG	GG	CC	AA	CC	CC	CC
4940CB03	AA	AG	AA	GG	CC	AA	AG	AG	CT	AC	CT	GG	CG	CC	AG	CC	CC	CC
4940CB04	AC	AA	AG	AG	CC	AC	AG	GG	CT	AC	CT	GG	CG	CC	AA	CC	CC	CT
4996KV01	AC	GG	AG	GG	CG	CC	AA	AG	CT	AA	CT	GT	CG	CC	AG	CC	CC	CT
4996KV03	AC	GG	GG	AG	CG	AC	AG	AG	CT	AC	TT	GG	CG	CC	GG	TT	CC	CC
5112NF01	CC	GG	AG	AA	CC	AC	AA	GG	CT	AC	TT	GT	GG	AC	AG	TT	CC	TT
5295PS02	CC	AG	AG	AG	CG	CC	GG	AG	CT	CC	TT	GG	CG	AC	GG	CT	CT	TT
5625AC01	AC	AG	AA	AG	CG	AA	GG	AG	CT	CC	CT	GG	CG	CC	AA	TT	CT	CT
6432AM01	AA	AG	AG	AA	GG	AC	GG	GG	CT	AC	TT	GT	GG	AC	AG	CT	CT	CT
6432AM02	AC	AG	AG	AG	GG	AA	AG	AG	CT	CC	TT	GT	GG	AA	AG	CC	CT	TT
6668CM01	AA	AA	AG	AG	CG	AA	AA	AG	CT	CC	TT	GT	CG	AC	AA	TT	CC	CT
8134CY04	CC	AA	AG	AA	CC	AC	AA	GG	CT	CC	TT	GT	GG	CC	AA	CT	CT	CC
8134CY06	CC	AG	GG	AG	CC	AA	AA	GG	CT	AC	CT	GG	CG	CC	AG	CT	CT	CC
8426CC01	??	AG	AA	AA	CG	AC	AA	AG	CT	AC	CT	GG	GG	AC	GG	CC	CC	CC
8426CC02	CC	AG	AA	AA	CG	AC	AA	AG	CT	CC	TT	GT	GG	AC	AG	CT	CC	CT
8426CC03	CC	GG	AG	AA	CG	AA	AA	AG	CT	AC	TT	GT	GG	CC	AG	CC	CC	CC
8844PD01	AC	AA	AG	AG	CC	AA	AG	GG	CT	CC	CT	GG	CC	AC	AA	CT	TT	CC
Red cells indicate where there is evidence for p.R114W occurring on a different haplotype background because of opposite homozygous genotypes flanking p.R114W
