# Supplementary material for: The Common p.R114W HNF4A Mutation Causes a Distinct Clinical Subtype of Monogenic Diabetes
Source: Oxford University Press journal article supplement (doi:10.2337/db16-0628), 2016-08-02
Supplement: db160628supplementarydata3.xlsx [file db160628supplementarydata3.xlsx]

## Sheet: Sheet1
Study	cases CC/CT/TT	controls CC/CT/TT	OR	Fishers exact P
GoDARTS	0/3/6446	0/1/6702	3.11914	0.366
EXTEND/EFS	0/2/750	0/1/4712	12.5653	0.052
W2/NBS	0/4/1955	0/2/1476	1.50997	0.705
Combined	0/9/9151	0/4/12890	3.169	0.051
