# Supplementary material for: The Common p.R114W HNF4A Mutation Causes a Distinct Clinical Subtype of Monogenic Diabetes
Source: Oxford University Press journal article supplement (doi:10.2337/db16-0628), 2016-08-02
Supplement: db160628supplementarydata5.xlsx [file db160628supplementarydata5.xlsx]

## Sheet: Sheet1
SIFT_score	SIFT_pred	Polyphen2_HDIV_score	Polyphen2_HDIV_pred	Polyphen2_HVAR_score	Polyphen2_HVAR_pred	LRT_score	LRT_pred	MutationTaster_score	MutationTaster_pred	MutationAssessor_score	MutationAssessor_pred	FATHMM_score	FATHMM_pred	RadialSVM_score	RadialSVM_pred	LR_score	LR_pred	VEST3_score	CADD_raw	CADD_phred	GERP++_RS	VEP impact	nearestSSChange	localSpliceEffect	conservedDistSpecies
0	D	1	D	0.988	D	0	D	1	D	3.085	M	-3.53	D	1.018	D	0.912	D	0.95	3.884	19.74	3.06	Moderate	0	none	Fruitfly
